# Supplementary material for: d-Allulose 3-epimerase of Bacillus sp. origin manifests profuse heat‐stability and noteworthy potential of d-fructose epimerization
Source: PubMed Central journal article supplement (PMC7934257; doi:10.1186/s12934-021-01550-1), 2021-03-04
Supplement: 12934_2021_1550_MOESM1_ESM.pdf [file 12934_2021_1550_MOESM1_ESM.pdf]

## **D-allulose 3-epimerase of *Bacillus* sp. origin manifests profuse heat-stability and noteworthy potential of D-fructose epimerization**

Satya Narayan Patel<sup>1</sup>, Girija Kaushal<sup>1</sup>, Sudhir P. Singh<sup>1,\*</sup>

<sup>1</sup>Center of Innovative and Applied Bioprocessing, S.A.S. Nagar, Sector-81  
(Knowledge City) Mohali-140306, India

\*Corresponding author

\*Sudhir P. Singh: [sudhirsingh@ciab.res.in](mailto:sudhirsingh@ciab.res.in)

| Gene Source                 | <i>R. baltica</i> | <i>A. globiformis</i> | <i>S. aureus</i> | <i>R. sphaeroides</i> | <i>Sinorhizobium sp.</i> | <i>P. cichorii</i> | <i>C. fortuita</i> | <i>F. plautii</i> | <i>daeM</i> | <i>Bacillus sp. (DaeB)*</i> | <i>Desmospora sp.</i> | <i>P. senegalensis</i> | <i>C. boltea</i> | <i>T. primitia</i> | <i>Ruminococcus sp.</i> | <i>A. fabrum</i> | <i>Agrobacterium ATCC</i> | <i>C. cellulolyticum</i> | <i>Clostridium sp.</i> | <i>C. scindens</i> | <i>Dorea sp.</i> |
|-----------------------------|-------------------|-----------------------|------------------|-----------------------|--------------------------|--------------------|--------------------|-------------------|-------------|-----------------------------|-----------------------|------------------------|------------------|--------------------|-------------------------|------------------|---------------------------|--------------------------|------------------------|--------------------|------------------|
| <i>R. baltica</i>           | 100               | 19.77                 | 20.93            | 22.69                 | 20.46                    | 22.14              | 20.23              | 18.63             | 23.17       | 18.15                       | 19.69                 | 19.69                  | 21.54            | 21.92              | 19.62                   | 21.62            | 21.24                     | 22.01                    | 22.39                  | 21.71              | 23.26            |
| <i>A. globiformis</i>       | 19.77             | 100                   | 78.89            | 27.66                 | 28.47                    | 31.52              | 30.32              | 27.24             | 31.07       | 28.06                       | 30.11                 | 28.72                  | 26.52            | 27.92              | 26.88                   | 30.47            | 30.11                     | 26.86                    | 27.3                   | 28.32              | 27.96            |
| <i>S. aureus</i>            | 20.93             | 78.89                 | 100              | 26.6                  | 27.76                    | 28.99              | 27.8               | 26.16             | 30          | 25.9                        | 27.6                  | 27.3                   | 24.37            | 26.5               | 23.66                   | 28.32            | 27.96                     | 26.5                     | 26.6                   | 25.45              | 26.16            |
| <i>R. sphaeroides</i>       | 22.69             | 27.66                 | 26.6             | 100                   | 59.73                    | 30.04              | 29.58              | 27.72             | 28.32       | 27.4                        | 27.3                  | 28.77                  | 29.93            | 29.02              | 27.66                   | 31.91            | 31.91                     | 29.02                    | 29.12                  | 30.5               | 30.5             |
| <i>Sinorhizobium sp.</i>    | 20.46             | 28.47                 | 27.76            | 59.73                 | 100                      | 27.66              | 26.5               | 26.41             | 25.96       | 25.71                       | 25.62                 | 26.06                  | 27.3             | 28.07              | 24.91                   | 29.89            | 29.18                     | 26.32                    | 25.35                  | 26.33              | 25.98            |
| <i>P. cichorii</i>          | 22.14             | 31.52                 | 28.99            | 30.04                 | 27.66                    | 100                | 93.1               | 44.83             | 41.9        | 39.51                       | 42.31                 | 40.21                  | 36.24            | 35.31              | 34.27                   | 40.21            | 40.56                     | 42.66                    | 42.31                  | 39.65              | 38.25            |
| <i>C. fortuita</i>          | 20.23             | 30.32                 | 27.8             | 29.58                 | 26.5                     | 93.1               | 100                | 43.1              | 40          | 39.51                       | 41.81                 | 39.72                  | 35.42            | 34.49              | 34.84                   | 39.72            | 40.07                     | 40.42                    | 41.11                  | 39.51              | 37.06            |
| <i>F. plautii</i>           | 18.63             | 27.24                 | 26.16            | 27.72                 | 26.41                    | 44.83              | 43.1               | 100               | 39.86       | 36.81                       | 37.85                 | 39.24                  | 37.72            | 38.19              | 36.81                   | 44.79            | 44.44                     | 44.79                    | 44.79                  | 42.51              | 39.37            |
| <i>daeM</i>                 | 23.17             | 31.07                 | 30               | 28.32                 | 25.96                    | 41.9               | 40                 | 39.86             | 100         | 42.81                       | 44.06                 | 43.6                   | 39.02            | 41.87              | 40.56                   | 41.61            | 41.61                     | 44.98                    | 44.29                  | 41.96              | 41.61            |
| <i>Bacillus sp. (DaeB)*</i> | 18.15             | 28.06                 | 25.9             | 27.4                  | 25.71                    | 39.51              | 39.51              | 36.81             | 42.81       | 100                         | 68.06                 | 61.46                  | 47.57            | 50                 | 49.31                   | 47.57            | 47.57                     | 52.78                    | 53.12                  | 50.87              | 51.22            |
| <i>Desmospora sp.</i>       | 19.69             | 30.11                 | 27.6             | 27.3                  | 25.62                    | 42.31              | 41.81              | 37.85             | 44.06       | 68.06                       | 100                   | 68.17                  | 47.4             | 52.25              | 48.79                   | 49.83            | 50.17                     | 49.83                    | 50.87                  | 50.35              | 50.35            |
| <i>P. senegalensis</i>      | 19.69             | 28.72                 | 27.3             | 28.77                 | 26.06                    | 40.21              | 39.72              | 39.24             | 43.6        | 61.46                       | 68.17                 | 100                    | 46.37            | 52.4               | 48.79                   | 51.56            | 51.56                     | 50.34                    | 51.71                  | 51.56              | 52.25            |
| <i>C. boltea</i>            | 21.54             | 26.52                 | 24.37            | 29.93                 | 27.3                     | 36.24              | 35.42              | 37.72             | 39.02       | 47.57                       | 47.4                  | 46.37                  | 100              | 68.04              | 62.54                   | 49.48            | 49.13                     | 52.94                    | 53.98                  | 51.74              | 52.43            |
| <i>T. primitia</i>          | 21.92             | 27.92                 | 26.5             | 29.02                 | 28.07                    | 35.31              | 34.49              | 38.19             | 41.87       | 50                          | 52.25                 | 52.4                   | 68.04            | 100                | 62.54                   | 55.36            | 55.02                     | 58.36                    | 59.25                  | 55.02              | 56.06            |
| <i>Ruminococcus sp.</i>     | 19.62             | 26.88                 | 23.66            | 27.66                 | 24.91                    | 34.27              | 34.84              | 36.81             | 40.56       | 49.31                       | 48.79                 | 48.79                  | 62.54            | 62.54              | 100                     | 50.52            | 49.83                     | 52.25                    | 52.94                  | 52.78              | 52.08            |
| <i>A. fabrum</i>            | 21.62             | 30.47                 | 28.32            | 31.91                 | 29.89                    | 40.21              | 39.72              | 44.79             | 41.61       | 47.57                       | 49.83                 | 51.56                  | 49.48            | 55.36              | 50.52                   | 100              | 97.92                     | 60.9                     | 61.25                  | 59.03              | 59.03            |
| <i>Agrobacterium ATCC</i>   | 21.24             | 30.11                 | 27.96            | 31.91                 | 29.18                    | 40.56              | 40.07              | 44.44             | 41.61       | 47.57                       | 50.17                 | 51.56                  | 49.13            | 55.02              | 49.83                   | 97.92            | 100                       | 60.55                    | 61.25                  | 58.68              | 57.99            |
| <i>C. cellulolyticum</i>    | 22.01             | 26.86                 | 26.5             | 29.02                 | 26.32                    | 42.66              | 40.42              | 44.79             | 44.98       | 52.78                       | 49.83                 | 50.34                  | 52.94            | 58.36              | 52.25                   | 60.9             | 60.55                     | 100                      | 94.18                  | 61.94              | 60.55            |
| <i>Clostridium sp.</i>      | 22.39             | 27.3                  | 26.6             | 29.12                 | 25.35                    | 42.31              | 41.11              | 44.79             | 44.29       | 53.12                       | 50.87                 | 51.71                  | 53.98            | 59.25              | 52.94                   | 61.25            | 61.25                     | 94.18                    | 100                    | 62.63              | 61.25            |
| <i>C. scindens</i>          | 21.71             | 28.32                 | 25.45            | 30.5                  | 26.33                    | 39.65              | 39.51              | 42.51             | 41.96       | 50.87                       | 50.35                 | 51.56                  | 51.74            | 55.02              | 52.78                   | 59.03            | 58.68                     | 61.94                    | 62.63                  | 100                | 78.2             |
| <i>Dorea sp.</i>            | 23.26             | 27.96                 | 26.16            | 30.5                  | 25.98                    | 38.25              | 37.06              | 39.37             | 41.61       | 51.22                       | 50.35                 | 52.25                  | 52.43            | 56.06              | 52.08                   | 59.03            | 57.99                     | 60.55                    | 61.25                  | 78.2               | 100              |

Fig. S1 Identity (%) matrix of DaeB with the previously characterized ketose 3-epimerases

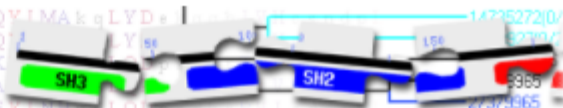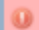

COVID-19 is an emerging, rapidly evolving situation.  
 Get the latest public health information from CDC: <https://www.coronavirus.gov>.  
 Get the latest research from NIH: <https://www.nih.gov/coronavirus>.  
 Find NCBI SARS-CoV-2 literature, sequence, and clinical content: <https://www.ncbi.nlm.nih.gov/sars-cov-2/>.

Conserved domains on [lcl|Query\_1585]

View **Standard Results**

DAEB

Graphical summary  Zoom to residue level show extra options >

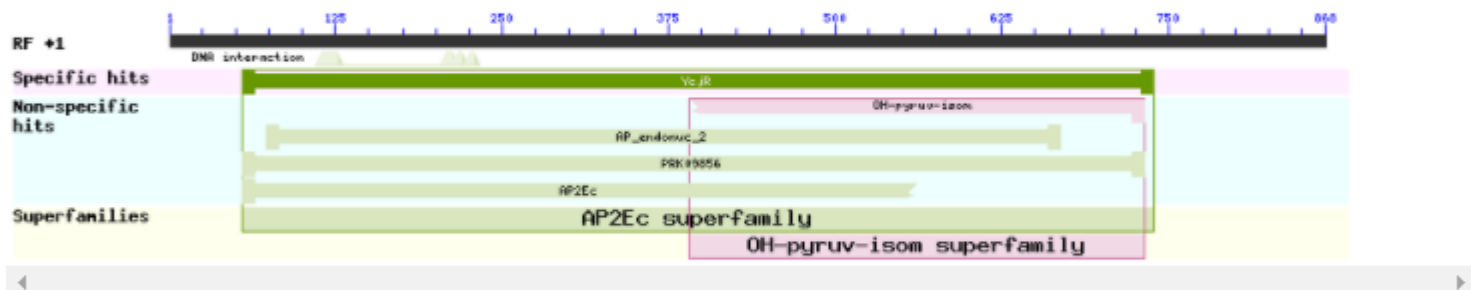

[Search for similar domain architectures](#) [Refine search](#)

List of domain hits

| +   | Name          | Accession | Description                                                                                        | Interval | E-value  |
|-----|---------------|-----------|----------------------------------------------------------------------------------------------------|----------|----------|
| [H] | YcjR          | COG1082   | Sugar phosphate isomerase/epimerase [Carbohydrate transport and metabolism];                       | 55-738   | 8.61e-19 |
| [H] | OH-pyruv-isom | TIGR03234 | hydroxypyruvate isomerase; This enzyme interconverts tartronate semi-aldehyde (TSA, aka ...        | 391-732  | 4.52e-12 |
| [H] | AP_endonuc_2  | pfam01261 | Xylose isomerase-like TIM barrel; This TIM alpha/beta barrel structure is found in xylose ...      | 73-869   | 2.36e-09 |
| [H] | PRK09856      | PRK09856  | fructoselysine 3-epimerase; Provisional                                                            | 55-732   | 1.50e-07 |
| [H] | AP2Ec         | cd00019   | AP endonuclease family 2; These endonucleases play a role in DNA repair. Cleave phosphodiester ... | 55-581   | 8.93e-07 |

Blast search parameters

Data Source: Live blast search RID = S2CBK44Y014  
 User Options: Database: CDSEARCH/odd Low complexity filter: yes Composition Based Adjustment: yes E-value threshold: 0.01 Maximum number of hits: 500

References:

- Marchler-Bauer A et al. (2017), "CDD/SPARCLE: functional classification of proteins via subfamily domain architectures.", *Nucleic Acids Res.*45(D)200-3.
- Marchler-Bauer A et al. (2015), "CDD: NCBI's conserved domain database.", *Nucleic Acids Res.*43(D)222-6.

Fig. S2 Conserved domain analysis in DaeB protein

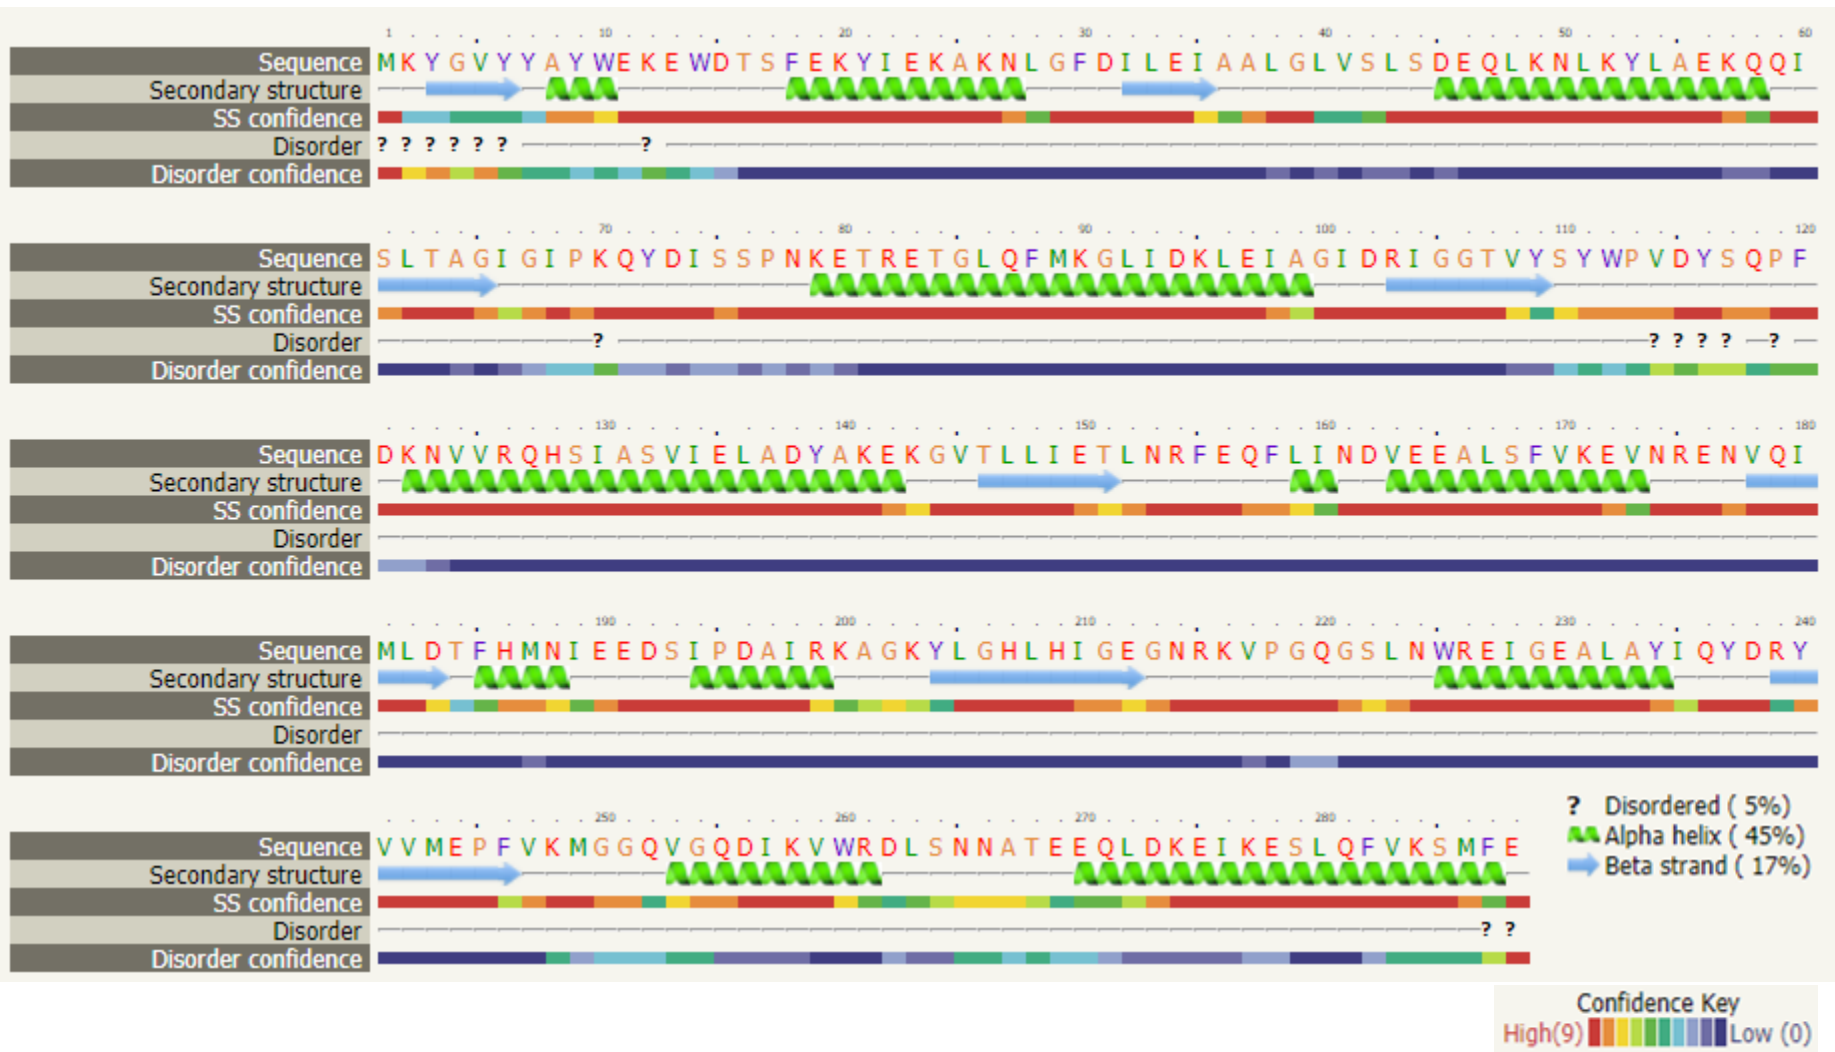

**Fig. S3** Predicted secondary structure of DaeB protein sequence. The information has been collected by Phyre2 web based service

(A)

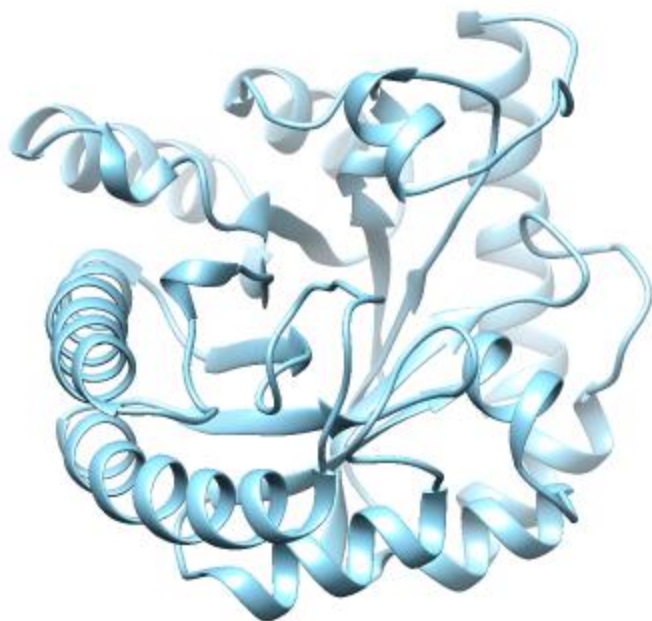

(B)

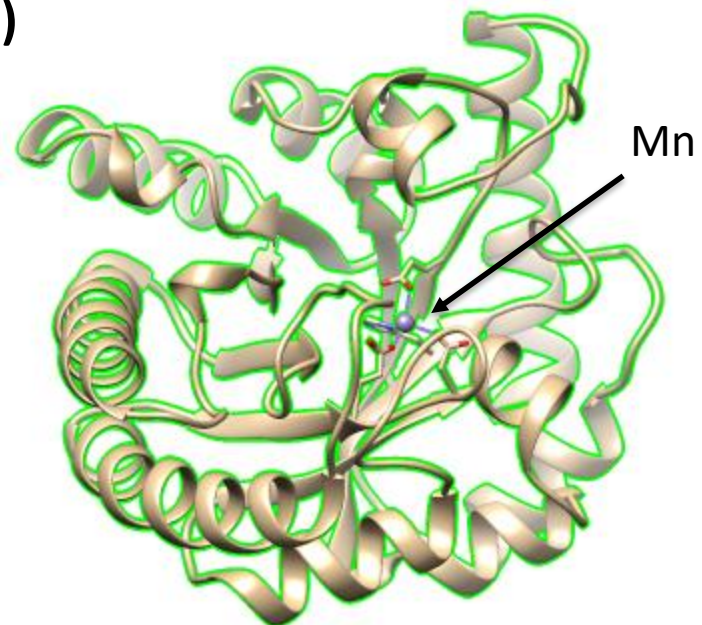

**Fig. S4** (A) A predicted 3D homology model of DaeB. A total of 288 amino acid residues of DaeB were modeled at 100% confidence. (B) Superimposition of the homology model of DaeB over the tertiary structure of *C. cellulolyticum* H10 (RMSD value 0.0Å)

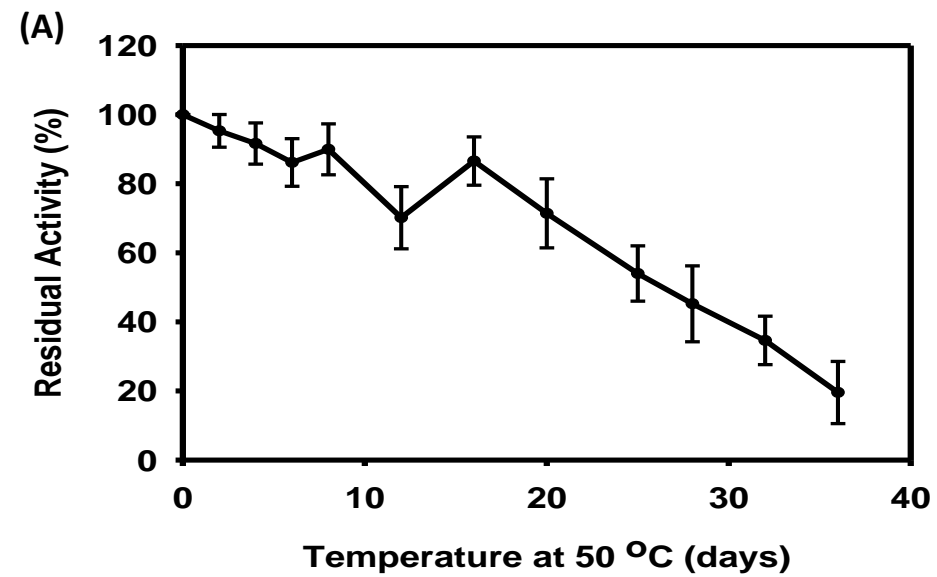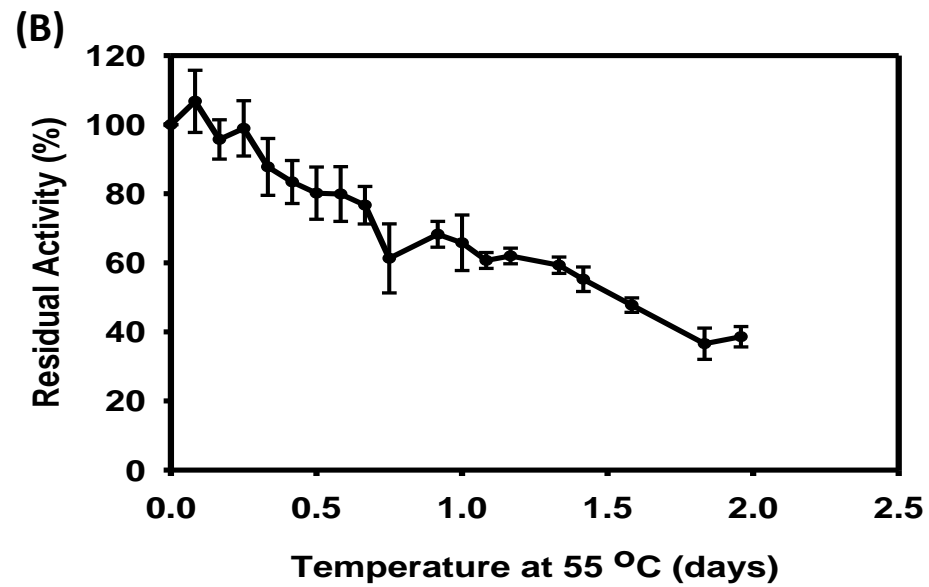

Fig. S5 Effect of temperature on the heat stability of DaeB at pH 8.0

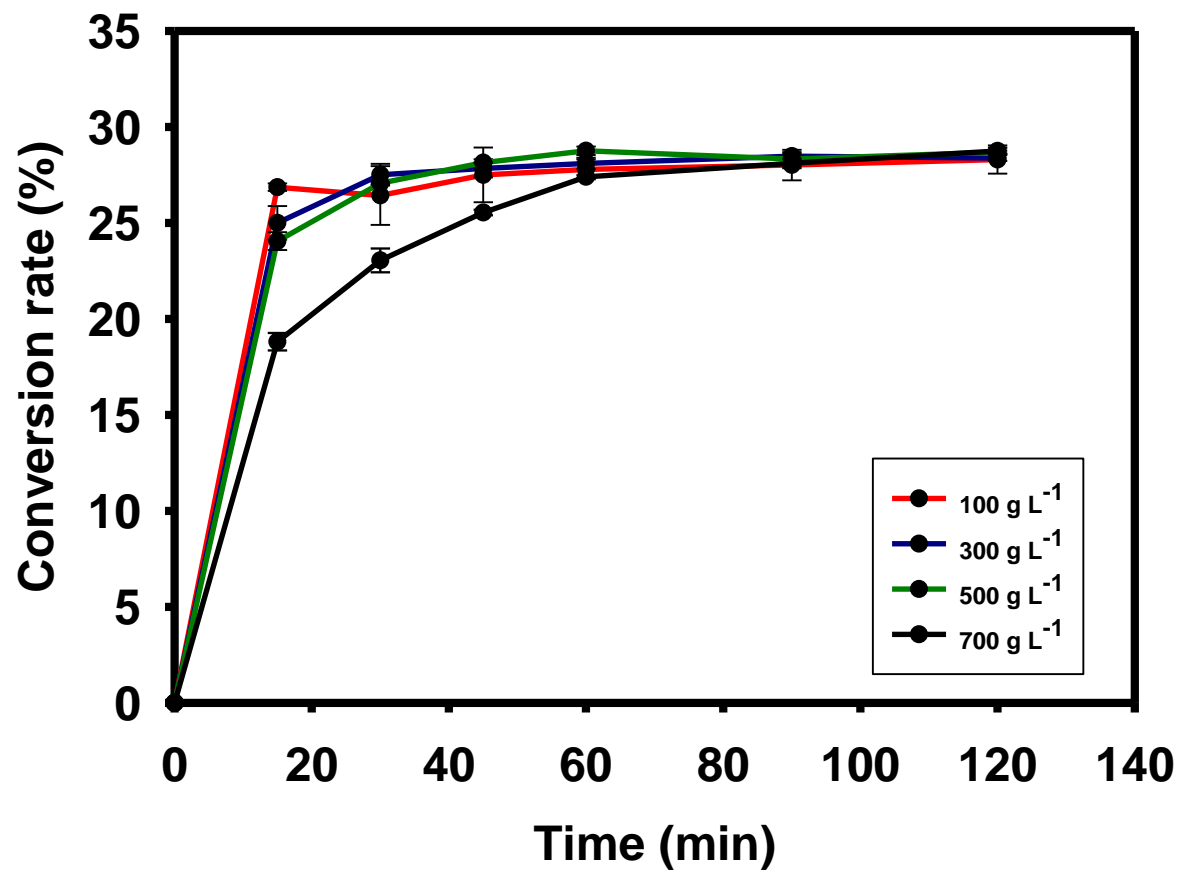

**Fig. S6** Time-point conversion of D-allulose from D-fructose (100-700 g L<sup>-1</sup>) using DaeB enzyme

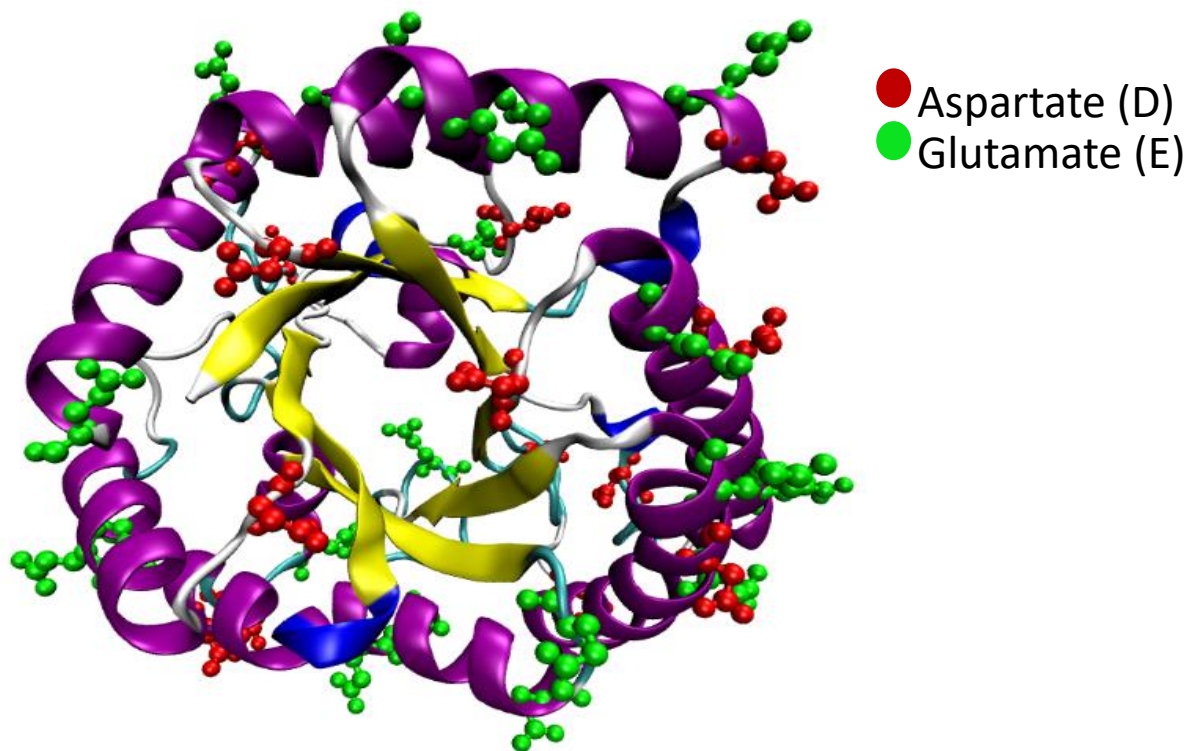

**Fig. S7** Homology model of DaeB showing acidic amino acid residues (Asp and Glu) on the surface of the protein



**Table S1.** Comparison of native molecular mass, kinetic parameters, and specific activity of DaeB and other ketose 3-epimerases.

| Enzyme                          | Source of gene                        | Native molecular mass | $K_m$ (mM) | $k_{cat}$ ( $s^{-1}$ ) | $k_{cat}/K_m$ ( $mM^{-1} s^{-1}$ ) | Specific activity ( $U\ mg^{-1}$ ) |
|---------------------------------|---------------------------------------|-----------------------|------------|------------------------|------------------------------------|------------------------------------|
| D-tagatose 3-epimerase (DTEase) | <i>Pseudomonas cichorii</i>           | Dimer                 | NR         | NR                     | NR                                 | NR                                 |
|                                 | <i>Caballeronia fortuita</i>          | Tetramer              | 81.9       | 157.21                 | 1.30                               | 270                                |
|                                 | <i>Sinorhizobium</i> sp.              | Dimer                 | 54.7       | 50                     | 0.91                               | NR                                 |
| D-allulose 3-epimerase (DAEase) | <i>Agrobacterium tumefaciens</i>      | Tetramer              | 24         | 34.46                  | 1.41                               | 8.89                               |
|                                 | <i>Clostridium cellulolyticum</i> H10 | Tetramer              | 53.5       | 55.9                   | 1.045                              | NR                                 |
|                                 | <i>Ruminococcus</i> sp.               | Tetramer              | 216        | 59.4                   | 0.26                               | 8.95                               |
|                                 | <i>Clostridium scindens</i>           | Tetramer              | 40.1       | 5.8                    | 0.145                              | NR                                 |
|                                 | <i>Clostridium</i> sp.                | Tetramer              | 279        | 272                    | 0.97                               | NR                                 |
|                                 | <i>Desmospora</i> sp. 8437            | Tetramer              | 549        | 1059.55                | 1.93                               | NR                                 |
|                                 | <i>Clostridium bolteae</i>            | Tetramer              | 59.8       | 59                     | 0.99                               | NR                                 |
|                                 | <i>Dorea</i> sp. CAG317               | Tetramer              | 153        | NR                     | 3.31                               | 803                                |
|                                 | <i>Treponema primitia</i> ZAS-1       | NR                    | 279        | 292                    | 1.05                               | 227.5                              |
|                                 | <i>Flavonifractor plautii</i>         | Tetramer              | 323        | 342                    | 1.066                              | NR                                 |
|                                 | <i>Arthrobacter globiformis</i>       | Tetramer              | 37.5       | 41.8                   | 1.115                              | 70.5                               |
|                                 | <i>Agrobacterium</i> sp. ATCC 31749   | Tetramer              | 110        | 106.7                  | 0.98                               | 90.5                               |
|                                 | <i>Paenibacillus senegalensis</i>     | NR                    | 366.7      | 40.92                  | 0.11                               | 25.2                               |
|                                 | <i>Staphylococcus aureus</i>          | Tetramer              | 59.3       | 22.9                   | 0.39                               | NR                                 |
|                                 | <i>Rhodopirellula baltica</i>         | Dimer                 | 78.13      | 14.90                  | 0.19                               | 11.7                               |
|                                 | DaeM                                  | Tetramer              | 141.43     | 41.99                  | 0.29                               | 7                                  |
|                                 | <i>Bacillus</i> sp. KCTC 13219 (DaeB) | Dimer                 | 130        | 367                    | 2.81                               | 127.2                              |
| D-fructose 3-epimerase (DFEase) | <i>Rhodobacter sphaeroides</i>        | Dimer                 | NR         | NR                     | NR                                 | NR                                 |
| L-ribulose 3-epimerase (LREase) | <i>Mesorhizobium loti</i>             | Tetramer              | NR         | NR                     | NR                                 | 4.0                                |

**Table S2.** The conserved active site amino acid residues in the ketose 3-epimerases for which protein structure has been determined, and the homologous residues identified in DaeB.

| Active sites                                                            | <i>Bacillus</i><br>sp. KCTC<br>13219<br>(DaeB) | <i>Pseudomonas</i><br><i>cichorii</i> | <i>Agrobacterium</i><br><i>tumefaciens</i> | <i>Clostridium</i><br><i>cellulolyticum</i> | <i>Rhodobacter</i><br><i>sphaeroides</i> |
|-------------------------------------------------------------------------|------------------------------------------------|---------------------------------------|--------------------------------------------|---------------------------------------------|------------------------------------------|
| <b>Metal co-coordinating site residue</b>                               | Glu150                                         | Glu152                                | Glu150                                     | Glu150                                      | Glu156                                   |
|                                                                         | Asp183                                         | Asp185                                | Asp183                                     | Asp183                                      | Asp189                                   |
|                                                                         | His209                                         | His211                                | His209                                     | His209                                      | Gln215                                   |
|                                                                         | Glu244                                         | Glu246                                | Glu244                                     | Glu244                                      | Glu250                                   |
| <b>Epimerization residues</b>                                           | Glu150                                         | Glu152                                | Glu150                                     | Glu150                                      | Glu156                                   |
|                                                                         | Glu244                                         | Glu246                                | Glu244                                     | Glu244                                      | Glu250                                   |
| <b>Binding sites for O-1, O-2, and O-3 of the substrate with enzyme</b> | Glu156                                         | Glu152                                | Glu156                                     | Glu156                                      | Glu162                                   |
|                                                                         | His186                                         | His188                                | His186                                     | His186                                      | His192                                   |
|                                                                         | Asp183                                         |                                       |                                            | Asp183                                      |                                          |
|                                                                         | Arg215                                         | Arg217                                | Arg215                                     | Arg215                                      | Arg221                                   |
|                                                                         | Glu150                                         | Glu152                                | Glu150                                     | Glu150                                      | Glu156                                   |
|                                                                         | Glu244                                         | Glu246                                | Glu244                                     | Glu244                                      | Glu250                                   |
| <b>Binding sites for O-4, O-5, and O-6 of the substrate with enzyme</b> | Tyr6                                           | Phe7                                  | Tyr6                                       | Tyr6                                        | Ile8                                     |
|                                                                         | Trp14                                          | Trp15                                 | Trp14                                      | Trp14                                       | Phe16                                    |
|                                                                         | Ile66                                          | Cys66                                 | Ile66                                      | His66                                       | Ala65                                    |
|                                                                         | Thr107                                         | Leu108                                | Ala107                                     | Ala107                                      | Pro107                                   |
|                                                                         | Trp112                                         | Trp113                                | Trp112                                     | Trp112                                      | Arg118                                   |
|                                                                         | His209                                         | His211                                | His209                                     | His209                                      | Gln215                                   |
|                                                                         | Phe246                                         | Phe248                                | Phe246                                     | Phe246                                      | Phe252                                   |
| <b>Reference</b>                                                        | This study                                     | [45]                                  | [44]                                       | [46]                                        | [47]                                     |

**Table S3.** *In silico* determination of allergenicity in DaeB protein.

| <b>S.No</b> | <b>Allergenicity prediction tools</b> | <b>Allergenic potential</b> |
|-------------|---------------------------------------|-----------------------------|
| 1           | Sortaller                             | Non-allergen                |
| 2           | AllerTOP                              | Non-allergen                |
| 3           | Allermatch                            | Non-allergen                |
| 4           | SDAP                                  | Non-allergen                |

**Table S4.** Total number of acidic amino acid residues (Asp+Glu), and acidic amino acid residues on the protein's surface of DAEases.

| Source organism of DAEases            | Total number of acidic amino acid residues | Acidic amino acid residues on the protein's surface |
|---------------------------------------|--------------------------------------------|-----------------------------------------------------|
| <i>Clostridium boltea</i>             | 49                                         | 39                                                  |
| <i>Desmospora</i> sp.                 | 49                                         | 38                                                  |
| <i>Pseudomonas cichorii</i>           | 46                                         | 38                                                  |
| <i>Bacillus</i> sp. KCTC 13219 (DaeB) | 46                                         | 37                                                  |
| <i>Agrobacterium fabrum</i>           | 38                                         | 37                                                  |
| <i>Clostridium scindens</i>           | 47                                         | 35                                                  |
| <i>Clostridium cellulolyticum</i> H10 | 43                                         | 35                                                  |
| <i>Flavonifractor plautii</i>         | 43                                         | 35                                                  |
| <i>Dorea</i> sp.                      | 46                                         | 34                                                  |
| <i>Rhodopirellula baltica</i>         | 45                                         | 33                                                  |
| <i>Paenibacillus senegalensis</i>     | 44                                         | 33                                                  |
| <i>Caballeronia fortuita</i>          | 44                                         | 33                                                  |
| <i>Rhodobacter sphaeroides</i>        | 40                                         | 33                                                  |
| <i>Sinorhizobium</i> sp.              | 40                                         | 33                                                  |
| <i>Ruminococcus</i> sp.               | 43                                         | 32                                                  |
| <i>Arthrobacter globiformis</i>       | 41                                         | 32                                                  |
| DaeM                                  | 42                                         | 31                                                  |
| <i>Treponema primitia</i>             | 41                                         | 31                                                  |
| <i>Clostridium</i> sp.                | 41                                         | 31                                                  |
| <i>Staphylococcus aureus</i>          | 40                                         | 31                                                  |
| <i>Agrobacterium</i> ATCC 31749       | 37                                         | 27                                                  |
